# Supplementary material for: Clinical Outcomes Associated with Monotherapy and Combination Therapy of Immune Checkpoint Inhibitors as First-Line Treatment for Advanced Hepatocellular Carcinoma in Real-World Practice: A Systematic Literature Review and Meta-Analysis
Source: MDPI journal article supplement (doi:10.3390/cancers15010260), 2022-12-30
Supplement: s1 [file s1]

## **Supplementary material**

*Clinical outcomes associated with monotherapy and combination therapy of immune checkpoint inhibitors as first-line treatment for advanced hepatocellular carcinoma in real-world practice: a systematic literature review and meta-analysis*

**Table S1. Study selection criteria**

| Study characteristic | Eligibility criteria                                                                                                                                                                                                                                                                                                                                                                                                                                                                 |
|----------------------|--------------------------------------------------------------------------------------------------------------------------------------------------------------------------------------------------------------------------------------------------------------------------------------------------------------------------------------------------------------------------------------------------------------------------------------------------------------------------------------|
| Patient population   | <ul style="list-style-type: none"><li>➤ Adults (age <math>\geq 18</math> years) with advanced HCC</li><li>➤ No experience of systemic treatment</li><li>➤ Not include metastatic carcinoma</li></ul>                                                                                                                                                                                                                                                                                 |
| Intervention         | <ul style="list-style-type: none"><li>➤ First-line ICIs-based monotherapy or combination therapy</li></ul>                                                                                                                                                                                                                                                                                                                                                                           |
| Comparator           | <ul style="list-style-type: none"><li>➤ All interventions except for first-line ICIs-based therapy</li><li>➤ Baseline (before/after comparison)</li><li>➤ No comparator</li></ul>                                                                                                                                                                                                                                                                                                    |
| Outcomes             | <p>Primary outcomes</p> <ul style="list-style-type: none"><li>➤ Median progression-free survival</li><li>➤ Median overall survival</li><li>➤ Median time to progress</li><li>➤ Objective response rate</li><li>➤ Disease control rate</li><li>➤ Treatment-related adverse events</li></ul> <p>Secondary outcomes</p> <ul style="list-style-type: none"><li>➤ Prognostic factors for survival</li><li>➤ Change of Child-Pugh score</li><li>➤ Health-related quality of life</li></ul> |
| Study type           | <ul style="list-style-type: none"><li>➤ Real-world cohort</li><li>➤ Real-world cross-sectional</li><li>➤ Real-world case-control</li></ul>                                                                                                                                                                                                                                                                                                                                           |
| Language             | <ul style="list-style-type: none"><li>➤ English</li></ul>                                                                                                                                                                                                                                                                                                                                                                                                                            |

Abbreviations: HCC, hepatocellular carcinoma; ICI, immune checkpoint inhibitor.

**Table S2. Search strategies**

| Search terms |                                                                                                                                                                                                                                                                                                                                                               |
|--------------|---------------------------------------------------------------------------------------------------------------------------------------------------------------------------------------------------------------------------------------------------------------------------------------------------------------------------------------------------------------|
| <b>1</b>     | (liver OR hepat*).mp. [mp=ti, ab, kw]                                                                                                                                                                                                                                                                                                                         |
| <b>2</b>     | (neoplas* OR cancer* OR tumor* OR tumour* OR carcinoma* OR oncolog* OR malign*).mp. [mp=ti, ab, kw]                                                                                                                                                                                                                                                           |
| <b>3</b>     | (atezolizumab OR Tecentriq OR rg7446 OR mpdl3280A).mp. OR (pembrolizumab OR MK-3475 OR lambrolizumab OR Keytruda).mp. OR (nivolumab OR Opdivo OR bms-936558 OR mdx-1106).mp. OR (camrelizumab OR SHR-1210 OR AiRuiKa OR HR-301210).mp. OR (sintilimab OR Tyvyt OR IBI308).mp. OR (PD-1 OR PD-L1 OR CTLA-4 OR immune checkpoint inhibitor).mp. [mp=ti, ab, kw] |
| <b>4</b>     | 1 AND 2 AND 3                                                                                                                                                                                                                                                                                                                                                 |

**Table S3. Quality assessment of included studies**

| Study                      | Representativeness<br>of the Exposed<br>Cohort | Selection of<br>the Non-<br>Exposed<br>Cohort | Ascertainment<br>of Exposure | Demonstration<br>That Outcome<br>Interest Was<br>Present at Start<br>of Study | Comparability of<br>Cohorts on the<br>Basis of the Design<br>or Analysis | Assessment<br>of Outcome | Was Follow-Up<br>Long Enough for<br>Outcomes to<br>Occur | Adequacy of<br>Follow Up of<br>Cohorts | Score |
|----------------------------|------------------------------------------------|-----------------------------------------------|------------------------------|-------------------------------------------------------------------------------|--------------------------------------------------------------------------|--------------------------|----------------------------------------------------------|----------------------------------------|-------|
| Alessio et al.,<br>2022    | 1                                              | 0                                             | 1                            | 1                                                                             | 0                                                                        | 1                        | 1                                                        | 1                                      | 6     |
| Ando et al., 2021          | 1                                              | 1                                             | 1                            | 1                                                                             | 2                                                                        | 1                        | 1                                                        | 1                                      | 9     |
| Armstrong et al.,<br>2020* | 1                                              | 0                                             | 1                            | 1                                                                             | 0                                                                        | 1                        | 1                                                        | 1                                      | 6     |
| Cedillo et al.,<br>2019*   | 1                                              | 0                                             | 1                            | 1                                                                             | 0                                                                        | 1                        | 1                                                        | 1                                      | 6     |
| Chen et al.,<br>2018*      | 1                                              | 0                                             | 1                            | 1                                                                             | 0                                                                        | 1                        | 1                                                        | 1                                      | 6     |
| Chen et al., 2021          | 1                                              | 1                                             | 1                            | 1                                                                             | 2                                                                        | 1                        | 1                                                        | 1                                      | 9     |

|                            |   |   |   |   |   |   |   |   |   |
|----------------------------|---|---|---|---|---|---|---|---|---|
| Cheng et al.,<br>2021*     | 1 | 1 | 1 | 1 | 0 | 1 | 1 | 1 | 7 |
| Cheon et al.,<br>2022      | 1 | 0 | 1 | 1 | 0 | 1 | 1 | 1 | 6 |
| Chiang et al.,<br>2021*    | 1 | 1 | 1 | 1 | 2 | 1 | 1 | 1 | 9 |
| Chon et al.,<br>2020*      | 1 | 0 | 1 | 1 | 0 | 1 | 1 | 1 | 6 |
| Chuma et al.,<br>2021      | 1 | 1 | 1 | 1 | 2 | 1 | 1 | 1 | 9 |
| Cui et al., 2020           | 1 | 0 | 1 | 1 | 0 | 1 | 1 | 1 | 6 |
| Dai et al., 2021           | 1 | 1 | 1 | 1 | 2 | 1 | 1 | 1 | 9 |
| Dharmapuri et<br>al. 2019* | 1 | 0 | 1 | 1 | 0 | 1 | 1 | 1 | 6 |
| Feng et al, 2017           | 1 | 0 | 1 | 1 | 0 | 1 | 1 | 1 | 6 |
| Garcia et al.,<br>2020*    | 1 | 1 | 1 | 1 | 2 | 1 | 1 | 1 | 9 |

|                          |   |   |   |   |   |   |   |   |   |
|--------------------------|---|---|---|---|---|---|---|---|---|
| Gaudel et al., 2021      | 1 | 0 | 1 | 1 | 0 | 1 | 1 | 1 | 6 |
| Gu et al., 2020*         | 1 | 0 | 1 | 1 | 0 | 1 | 1 | 1 | 6 |
| He et al., 2021          | 1 | 1 | 1 | 1 | 2 | 1 | 1 | 1 | 9 |
| Himmelsbach et al., 2022 | 1 | 0 | 1 | 1 | 0 | 1 | 1 | 1 | 6 |
| Huang et al., 2021       | 1 | 0 | 1 | 1 | 0 | 1 | 1 | 1 | 6 |
| Iwamoto et al., 2021     | 1 | 1 | 1 | 1 | 2 | 1 | 1 | 1 | 9 |
| Ju et al., 2022          | 1 | 1 | 1 | 1 | 2 | 1 | 1 | 1 | 9 |
| Lee et al., 2019*        | 1 | 0 | 1 | 1 | 0 | 1 | 1 | 0 | 5 |
| Lee et al., 2020         | 1 | 0 | 1 | 1 | 0 | 1 | 1 | 1 | 6 |
| Li et al., 2020*         | 1 | 1 | 1 | 1 | 0 | 1 | 1 | 1 | 7 |
| Liu et al., 2021         | 1 | 1 | 1 | 1 | 2 | 1 | 1 | 1 | 9 |
| Liu et al., 2021         | 1 | 0 | 1 | 1 | 0 | 1 | 1 | 1 | 6 |

|                    |   |   |   |   |   |   |   |   |
|--------------------|---|---|---|---|---|---|---|---|
| Mei et al., 2021   | 1 | 1 | 1 | 2 | 1 | 1 | 1 | 9 |
| Rao et al., 2019*  | 1 | 1 | 1 | 0 | 1 | 1 | 1 | 7 |
| Ren et al., 2022   | 1 | 1 | 1 | 2 | 1 | 1 | 1 | 9 |
| Smith et al. 2020  | 0 | 1 | 1 | 0 | 1 | 1 | 1 | 6 |
| Teng et al., 2021  | 0 | 1 | 1 | 0 | 1 | 1 | 1 | 6 |
| Wang et al., 2021  | 1 | 1 | 1 | 2 | 1 | 1 | 1 | 9 |
| Wu et al., 2021    | 0 | 1 | 1 | 0 | 1 | 1 | 1 | 6 |
| Xie et al., 2021   | 1 | 1 | 1 | 0 | 1 | 1 | 1 | 7 |
| You et al., 2021*  | 0 | 1 | 1 | 0 | 1 | 1 | 1 | 6 |
| Zhang et al., 2022 | 0 | 1 | 1 | 0 | 1 | 1 | 1 | 6 |

---

\*Conference abstract.

**Table S4. Characteristics of included studies**

| Author,<br>year               | Study type    | Region | Data source                      | Patient population |        |             |                 | Baseline characteristics of study population |         |                   |                     |
|-------------------------------|---------------|--------|----------------------------------|--------------------|--------|-------------|-----------------|----------------------------------------------|---------|-------------------|---------------------|
|                               |               |        |                                  | HBV, %             | HCV, % | NAFLD,<br>% | Alcoholic,<br>% | Age, years<br>(mean or<br>median)            | Male, % | Child-<br>Pugh, % | BCLC, %             |
| Alessio et al.,<br>2022[1]    | Retrospective | Global | Medical records<br>(multicenter) | 18.8               | 37.1   | 11.4        | 19.3            | 69                                           | 85      | 76 (A)/24 (B)     | 2 (A)/27 (B)/71 (C) |
| Ando et al.,<br>2021[2]       | Retrospective | Japan  | EMR (single center)              |                    | 65.0   | NA          | NA              | 69                                           | 75.0    | 100 (A)           | 45.0 (B)/55.0 (C)   |
| Armstrong et al.,<br>2020[3]* | Retrospective | USA    | Medical records (single center)  | 30                 | 42     | NA          | NA              | NA                                           | 72      | NA                | NA                  |
| Cedillo et al.,<br>2019[4]*   | Retrospective | USA    | Medical records (single center)  | NA                 | NA     | NA          | NA              | 56.3                                         | 77.3    | NA                | NA                  |



|                     |    |               |                |                                 |                       |                       |    |    |                   |                       |                      |                                                             |
|---------------------|----|---------------|----------------|---------------------------------|-----------------------|-----------------------|----|----|-------------------|-----------------------|----------------------|-------------------------------------------------------------|
| Chen al., 2018[5]*  | et | Retrospective | Taiwan         | Medical records (single center) | 49                    | 21                    | NA | NA | 63                | 79                    | 51 (A)/26 (B)/23 (C) | NA                                                          |
| Chen al., 2021[6]   | et | Retrospective | Mainland China | Medical records (multicenter)   | PLT, 54.3<br>LT, 61.1 | PLT, 30.0<br>LT, 27.8 | NA | NA | PLT, 58<br>LT, 57 | PLT, 52.9<br>LT, 52.8 | 100 (A)              | PLT, 67.1<br>(B)/32.9<br>(C)<br>LT, 62.5<br>(B)/37.5<br>(C) |
| Cheng al., 2021[7]* | et | Retrospective | Mainland China | Medical records (single center) | NA                    | NA                    | NA | NA | NA                | NA                    | NA                   | 10.5<br>(B)/89.5<br>(C)                                     |
| Cheon al., 2022[8]  | et | Retrospective | Korea          | Medical records (multicenter)   | 76.9                  | 5.0                   | NA | NA | 61                | 83.5                  | 100 (A)              | 20.7<br>(B)/79.3<br>(C)                                     |
| Chiang al.,         | et | Retrospective | Hong Kong      | EMR (single center)             | SBRT-IO, 75.0         | NA                    | NA | NA | SBRT-IO, 66.5     | SBRT-IO, 87.5         | SBRT-IO, 87.5 (A)    | SBRT-IO, 18.8                                               |

|                        |               |                |                               |      |            |    |    |    |          |                   |                           |                                                                          |
|------------------------|---------------|----------------|-------------------------------|------|------------|----|----|----|----------|-------------------|---------------------------|--------------------------------------------------------------------------|
| 2021[9]*               |               |                |                               |      | TACE, 54.2 |    |    |    | TACE, 73 | TACE, 89.6        | TACE, 95.8 (A)            | (A)/33.3<br>(B)/50.0<br>(C)<br>TACE, 18.7<br>(A)/31.3<br>(B)/50.0<br>(C) |
| Chon et al., 2020[10]* | Retrospective | Korea          | Medical records (multicenter) | 72   | NA         | NA | NA | 60 | 85       | NA                | NA                        | NA                                                                       |
| Chuma et al., 2021[11] | Retrospective | Japan          | Medical records (multicenter) | 19.1 | 33.0       | NA | NA | 73 | 77.7     | 86.2 (A)/13.8 (B) | 1.1 (A)/47.9 (B)/51.1 (C) |                                                                          |
| Cui et al., 2020[12]   | Retrospective | Mainland China | Medical records (single       | 78   | 4          | NA | NA | 56 | 83.6     | 63.6 (A)/32.7     | NA                        |                                                                          |

|                                    |               |                   |                                       |      |    |    |      |                                                                       |      |          |          |
|------------------------------------|---------------|-------------------|---------------------------------------|------|----|----|------|-----------------------------------------------------------------------|------|----------|----------|
|                                    |               |                   | center)                               |      |    |    |      |                                                                       |      | (B)/3.6  |          |
|                                    |               |                   |                                       |      |    |    |      |                                                                       |      | (C)      |          |
| Dai et al.,<br>2021[13]            | Retrospective | Mainland<br>China | Medical<br>records (single<br>center) | 75.0 | NA | NA | 16.3 | 55.2                                                                  | 87.5 | 47.5     | 30.0     |
|                                    |               |                   |                                       |      |    |    |      |                                                                       |      | (A)/52.5 | (B)/70.0 |
|                                    |               |                   |                                       |      |    |    |      |                                                                       |      | (B)      | (C)      |
| Dharmapu<br>ri et al.<br>2019[14]* | Retrospective | USA               | Medical<br>records (single<br>center) | 38   | 54 | 9  | 7    | 66                                                                    | 84   | 67       | (A)/33   |
|                                    |               |                   |                                       |      |    |    |      |                                                                       |      | (B)      | (C)      |
| Feng et al,<br>2017[15]            | Retrospective | Mainland<br>China | Medical<br>records (single<br>center) | NA   | NA | NA | NA   | 54.8                                                                  | NA   | NA       | 36.4     |
|                                    |               |                   |                                       |      |    |    |      |                                                                       |      |          | (B)/63.6 |
|                                    |               |                   |                                       |      |    |    |      |                                                                       |      |          | (C)      |
| Garcia et<br>al.,<br>2020[16]*     | Retrospective | USA               | Medical<br>records (single<br>center) | NA   | NA | NA | NA   | Patients<br>with<br>irAEs, 69<br><br>Patients<br>without<br>irAEs, 70 | 76.7 | 73.3     | 6.7      |
|                                    |               |                   |                                       |      |    |    |      |                                                                       |      | (A)/26.7 | (B)/93.3 |
|                                    |               |                   |                                       |      |    |    |      |                                                                       |      | (B)      | (C)      |

|                         |               |                |                                 |                              |      |      |      |                                           |                              |                                    |                                    |
|-------------------------|---------------|----------------|---------------------------------|------------------------------|------|------|------|-------------------------------------------|------------------------------|------------------------------------|------------------------------------|
| Gaudel et al., 2021[17] | Retrospective | USA            | Medical records (single center) | NA                           | 71.4 | 14.3 | NA   | 63.5                                      | 100                          | 64.2 (A)/35.8 (B)                  | NA                                 |
| Gu et al., 2020[18]*    | Retrospective | Mainland China | Medical records (single center) | NA                           | NA   | NA   | NA   | 51.7                                      | 83.3                         | 100 (A)                            | 100 (C)                            |
| He et al., 2021[19]     | Retrospective | Mainland China | EMR (multicenter)               | LeToHA IC, 87.3<br>LEN, 90.7 | NA   | NA   | NA   | LeToHAI C, ≤ 50 y, 56.3%<br>> 50 y, 43.7% | LeToHA IC, 83.1<br>LEN, 89.5 | LeToHAI C, 100 (A)<br>LEN, 100 (A) | LeToHAI C, 100 (C)<br>LEN, 100 (C) |
| Himmelsb                | Retrospective | Germany        | Medical                         | 13.6                         | 21.2 | 27.3 | 37.9 | 65                                        | 81.8                         | 53.0                               | 1.5                                |

|                                |               |                   |                                       |                               |                              |    |    |                           |                               |                                                              |                                                             |                                         |
|--------------------------------|---------------|-------------------|---------------------------------------|-------------------------------|------------------------------|----|----|---------------------------|-------------------------------|--------------------------------------------------------------|-------------------------------------------------------------|-----------------------------------------|
| ach et al.,<br>2022[20]        |               | and<br>Austria    | records<br>(multicenter)              |                               |                              |    |    |                           |                               |                                                              | (A)/34.8<br>(B)/7.6<br>(C)<br>(D)                           | (A)/33.3<br>(B)/53.0<br>(C)/12.1<br>(D) |
| Huang et al.,<br>2021[21]      | Retrospective | Mainland<br>China | Medical<br>records (single<br>center) | 85.0                          | NA                           | NA | NA | 54.0                      | 91.7                          | 96.7                                                         | 3.3<br>(A)/3.3<br>(B)<br>(C)                                | (A)/20.0<br>(B)/76.7<br>(C)             |
| Iwamoto<br>et al.,<br>2021[22] | Retrospective | Japan             | Medical<br>records<br>(multicenter)   | 13.7                          | 37.3                         | NA | NA | 71                        | 88.2                          | 92.2                                                         | 47.1<br>(A)/7.8<br>(B)                                      | (B)/52.9<br>(C)                         |
| Ju et al.,<br>2022[23]         | Retrospective | Mainland<br>China | Medical<br>records (single<br>center) | AC, 84.6<br>TACE+<br>AC, 85.7 | AC, 11.5<br>TACE+<br>AC, 3.6 | NA | NA | AC, 55<br>TACE+A<br>C, 52 | AC, 84.6<br>TACE+A<br>C, 82.1 | AC, 78.8<br>(A)/21.2<br>(B)<br>TACE+A<br>C, 76.8<br>(A)/23.2 | AC, 9.6<br>(B)/90.4<br>(C)<br>TACE+A<br>C, 23.2<br>(B)/76.8 |                                         |

|                          |               |                   |                                       |                                   |      |    |    |                                |                                   |                                            |                                        |
|--------------------------|---------------|-------------------|---------------------------------------|-----------------------------------|------|----|----|--------------------------------|-----------------------------------|--------------------------------------------|----------------------------------------|
|                          |               |                   |                                       |                                   |      |    |    |                                |                                   | (B)                                        | (C)                                    |
| Lee et al.,<br>2019[24]* | Prospective   | Taiwan            | Medical<br>records (single<br>center) | NA                                | NA   | NA | NA | NA                             | NA                                | NA                                         | NA                                     |
| Lee et al.,<br>2020[25]  | Retrospective | Taiwan            | Medical<br>records (single<br>center) | 65.3                              | 22.1 | NA | NA | 65.5                           | 76.8                              | 72.6 (A)/<br>24.2 (B)/3.2 (C)              | 21.1 (C)<br>(B)/78.9 (C)               |
| Li et al.,<br>2020[26]*  | Retrospective | Mainland<br>China | Medical<br>records (single<br>center) | NA                                | NA   | NA | NA | PL, 54.8<br>LEN, 53.2          | NA                                | PL, 72.7 (A)<br>LEN, 68.1 (A)              | PL, 81.8 (C)<br>LEN, 90.9 (C)          |
| Liu et al.,<br>2021[27]  | Retrospective | Mainland<br>China | Medical<br>records (single<br>center) | Cam/SO<br>R, 94.3<br>SOR,<br>80.0 | NA   | NA | NA | Cam/SOR<br>, 53.0<br>SOR, 53.2 | Cam/SO<br>R, 91.4<br>SOR,<br>83.1 | Cam/SOR<br>, 5.7 (A)/94.3 (B)<br>SOR, 12.3 | Cam/SO<br>R, 31.4 (B)/68.6 (C)<br>SOR, |

|                          |               |                   |                                       |              |          |    |    |           |              |            |          |
|--------------------------|---------------|-------------------|---------------------------------------|--------------|----------|----|----|-----------|--------------|------------|----------|
|                          |               |                   |                                       |              |          |    |    |           |              | (A)/87.7   | 23.1     |
|                          |               |                   |                                       |              |          |    |    |           |              | (B)        | (B)/76.9 |
|                          |               |                   |                                       |              |          |    |    |           |              |            | (C)      |
| Liu et al.,<br>2021[28]  | Retrospective | Mainland<br>China | Medical<br>records (single<br>center) | 68.2         | 18.2     | NA | NA | 57.7      | 77.3         | 72.7       | 54.5     |
|                          |               |                   |                                       |              |          |    |    |           |              | (A)/27.3   | (B)/45.5 |
|                          |               |                   |                                       |              |          |    |    |           |              | (B)        | (C)      |
| Mei et al.,<br>2021[29]  | Retrospective | Mainland<br>China | Medical<br>records (single<br>center) | HPL,<br>82.2 | HPL, 2.2 | NA | NA | HPL, 49.1 | HPL,<br>84.4 | HPL, 97.8  | HPL,     |
|                          |               |                   |                                       |              |          |    |    | PL, 50.1  |              | (A)/2.2    | 11.1     |
|                          |               |                   |                                       |              |          |    |    |           | PL, 72.0     | (B)        | (B)/88.9 |
|                          |               |                   |                                       |              |          |    |    |           |              | PL, 88.0   | (C)      |
|                          |               |                   |                                       |              |          |    |    |           |              | (A)/12.0   | PL, 12.0 |
|                          |               |                   |                                       |              |          |    |    |           |              | (B)        | (B)/88.0 |
|                          |               |                   |                                       |              |          |    |    |           |              |            | (C)      |
| Rao et al.,<br>2019[30]* | Prospective   | USA               | Medical<br>records (single<br>center) | NA           | 43       | 36 | NA | NA        | 71           | 36 (A)/36  | NA       |
|                          |               |                   |                                       |              |          |    |    |           |              | (B)/21 (C) |          |
| Ren et al.,              | Retrospective | Mainland          | Medical                               | D-           | NA       | NA | NA | D-TACE-   | D-           | D-TACE-    | D-TACE-  |

|                          |               |                |                                 |                                    |      |    |    |      |                           |                                    |                                                          |                                                          |
|--------------------------|---------------|----------------|---------------------------------|------------------------------------|------|----|----|------|---------------------------|------------------------------------|----------------------------------------------------------|----------------------------------------------------------|
| 2022[31]                 |               | China          | records (single center)         | TACE-C, 74.1<br>C-<br>TACE-C, 66.7 |      |    |    |      | C, 53.5<br>C-TACE-C, 52.7 | TACE-C, 85.2<br>C-<br>TACE-C, 81.5 | C, 88.9<br>(A)/11.1<br>(B)<br>C, 85.2<br>(A)/14.8<br>(B) | C, 33.3<br>(B)/66.7<br>(C)<br>C, 33.3<br>(B)/66.7<br>(C) |
| Smith et al.<br>2020[32] | Retrospective | USA            | EMR (single center)             | 86                                 | NA   | NA | NA | 83   | NA                        | 91 (C)                             |                                                          |                                                          |
| Teng et al.,<br>2021[33] | Retrospective | Taiwan         | Medical records (single center) | 65.6                               | 18.9 | NA | NA | 61.4 | 75.6                      | 84.4<br>(A)/15.6<br>(B)            | 17.8<br>(B)/82.2<br>(C)                                  |                                                          |
| Wang et al.,<br>2021[34] | Retrospective | Mainland China | Medical records (single center) | 100                                | NA   | NA | NA | 50   | 87.9                      | NA                                 | 0.5<br>(0)/4.4<br>(A)/25.8<br>(B)/69.2                   |                                                          |



|                           |                  |                   |                                       |                |                    |    |     |                                      |       |                         |                                     |              |
|---------------------------|------------------|-------------------|---------------------------------------|----------------|--------------------|----|-----|--------------------------------------|-------|-------------------------|-------------------------------------|--------------|
|                           |                  |                   |                                       |                |                    |    |     |                                      |       |                         | (C)                                 |              |
| Wu et al.,<br>2021[35]    | Retrospective    | Mainland<br>China | EMR<br>(multicenter)                  | 91.9           | NA                 | NA | NA  | 57                                   | 90.3  | NA                      | 9.7<br>(A)/33.9<br>(B) /56.5<br>(C) |              |
| Xie et al.,<br>2021[36]   | Retrospective    | Mainland<br>China | Medical<br>records (single<br>center) | 96.7           | NA                 | NA | NA  | ≤ 60 y,<br>66.7%<br>> 60 y,<br>33.3% | 85.0  | 90.0 (A)/<br>10.0 (B)   | 28.3<br>(B)/71.7<br>(C)             |              |
| You et al.,<br>2021[37]*  | Prospective      | Mainland<br>China | Medical<br>records<br>(multicenter)   | 79.47          | NA                 | NA | NA  | NA                                   | NA    | NA                      | NA                                  |              |
| Zhang et al.,<br>2022[38] | Retrospective    | Mainland<br>China | Medical<br>records (single<br>center) | 100            | NA                 | NA | NA  | 56                                   | 88.2  | 82.4<br>(A)/17.6<br>(B) | 47.1<br>(B)/52.9<br>(C)             |              |
| Author,<br>year           | Study drug(s), n |                   | Comparator                            | Follow-<br>up, | Outcome(s) studied |    |     |                                      |       |                         |                                     | NOS<br>score |
|                           |                  |                   |                                       |                | PFS                | OS | ORR | DCR                                  | TRAEs | Prognostic              |                                     |              |

|                            |    |                                                         | months              |     |   |   |   |   |   | factors |   |
|----------------------------|----|---------------------------------------------------------|---------------------|-----|---|---|---|---|---|---------|---|
| Alessio et al., 2022[1]    | et | Atezo/Bev, n = 202                                      | Baseline (pre-drug) | 9.0 | √ | √ | √ | √ | √ |         | 6 |
| Ando et al., 2021[2]       | et | Atezo/Bev, n = 40                                       | Baseline (pre-drug) | 3.9 |   |   | √ | √ | √ |         | 9 |
| Armstrong et al., 2020[3]* |    | Nivo, Pembro, Atezo/Bev, durvalumab, cemiplimab, n = 76 | Baseline (pre-drug) | NA  | √ | √ | √ | √ | √ |         | 6 |
| Cedillo et al., 2019[4]*   | et | Nivo, n = 22                                            | Baseline (pre-drug) | NA  |   | √ | √ | √ |   |         | 6 |
| Chen et al., 2018[5]*      | et | PD1/SOR, n = 43                                         | Baseline (pre-drug) | NA  | √ | √ | √ | √ | √ | √       | 6 |

|                         |                        |                     |               |   |   |   |   |   |   |   |
|-------------------------|------------------------|---------------------|---------------|---|---|---|---|---|---|---|
| Chen et al., 2021[6]    | PLT, n = 70            | LT, n = 72          | 27.0          | √ | √ | √ | √ | √ | 9 |   |
|                         |                        | Baseline (pre-drug) |               |   |   |   |   |   |   |   |
| Cheng et al., 2021[7]*  | Sintilimab/SOR, n = 31 | Baseline (pre-drug) | NA            | √ |   | √ | √ | √ | 7 |   |
|                         |                        |                     |               |   |   |   |   |   |   |   |
| Cheon et al., 2022[8]   | Atezo/Bev, n = 121     | Baseline (pre-drug) | 5.9           | √ |   | √ | √ | √ | √ | 6 |
|                         |                        |                     |               |   |   |   |   |   |   |   |
| Chiang et al., 2021[9]* | SBRT-IO, n = 16        | TACE, n = 48        | SBRT-IO, 12.7 | √ | √ | √ | √ | √ | √ | 9 |
|                         |                        | Baseline (pre-drug) | TACE, 7.4     |   |   |   |   |   |   |   |
| Chon et al., 2020[10]*  | Nivo, n = 148          | Baseline (pre-drug) | NA            |   |   | √ |   |   | √ | 6 |
|                         |                        |                     |               |   |   |   |   |   |   |   |
| Chuma et al., 2021[11]* | Atezo/Bev, n = 94      | Baseline (pre-drug) | 4.7           |   |   | √ | √ | √ |   | 9 |

|                   |                             |                |      |   |   |   |   |   |   |   |  |
|-------------------|-----------------------------|----------------|------|---|---|---|---|---|---|---|--|
| al.,              |                             | drug)          |      |   |   |   |   |   |   |   |  |
| 2021[11]          |                             |                |      |   |   |   |   |   |   |   |  |
| Cui et al.,       | Nivo, n = 36                | Baseline (pre- | 13   | √ | √ | √ | √ | √ | √ | 6 |  |
| 2020[12]          | Pembro, n = 13              | drug)          |      |   |   |   |   |   |   |   |  |
|                   | AK105, n = 6                |                |      |   |   |   |   |   |   |   |  |
| Dai et al.,       | Sintilimab, n = 22          | Between drugs  | NA   | √ | √ | √ | √ | √ | √ | 9 |  |
| 2021[13]          | Sintilimab/SOR, n = 23      | Baseline (pre- |      |   |   |   |   |   |   |   |  |
|                   | Sintilimab/SOR/TACE, n = 35 | drug)          |      |   |   |   |   |   |   |   |  |
| Dharmapuri et al. | Nivo, n = 104               | Baseline (pre- | 17.0 | √ | √ |   |   |   |   | 6 |  |
| 2019[14]*         |                             | drug)          |      |   |   |   |   |   |   |   |  |
| Feng et al.,      | Nivo, n = 11                | Baseline (pre- | NA   |   |   | √ | √ | √ |   | 6 |  |
| 2017[15]          |                             | drug)          |      |   |   |   |   |   |   |   |  |
| Garcia et al.,    | Nivo, n = 30                | Baseline (pre- | NA   | √ | √ | √ | √ | √ | √ | 9 |  |
| 2020[16]*         |                             | drug)          |      |   |   |   |   |   |   |   |  |

|                              |                                                              |                                    |     |   |   |   |   |   |   |   |
|------------------------------|--------------------------------------------------------------|------------------------------------|-----|---|---|---|---|---|---|---|
| Gaudel et al., 2021[17]      | Nivo, n = 14                                                 | Baseline (pre-drug)                | NA  | √ | √ | √ |   | √ |   | 6 |
| Gu et al., 2020[18]*         | HAIC/apatinib/toripalimab, n = 6                             | Baseline (pre-drug)                | 7.0 |   |   | √ | √ | √ |   | 6 |
| He et al., 2021[19]          | LeToHAIC, n = 71                                             | LEN, n = 86<br>Baseline (pre-drug) | NA  | √ | √ | √ | √ | √ | √ | 9 |
| Himmelsbach et al., 2022[20] | Atezo/Bev, n = 66                                            | Baseline (pre-drug)                | 6.9 | √ | √ | √ | √ | √ | √ | 6 |
| Huang et al., 2021[21]       | PD1 (Nivo, Cam, Pembro, sintilimab, toripalimab)/LEN, n = 60 | Baseline (pre-drug)                | NA  | √ |   | √ | √ | √ |   | 6 |
| Iwamoto et al., 2021[22]     | Atezo/Bev, n = 51                                            | Baseline (pre-drug)                | 2.9 | √ |   | √ | √ | √ |   | 9 |

|                       |                                                |                                      |                     |   |   |   |   |   |   |
|-----------------------|------------------------------------------------|--------------------------------------|---------------------|---|---|---|---|---|---|
| Ju et al., 2022[23]   | AC, n = 52<br>TACE+AC, n = 56                  | Between drugs<br>Baseline (pre-drug) | 13.5                | √ | √ | √ | √ | √ | 9 |
| Lee et al., 2019[24]* | Nivo, n = 12                                   | Baseline (pre-drug)                  | NA                  |   | √ | √ |   |   | 5 |
| Lee et al., 2020[25]  | Nivo, n = 92<br>Pembro, n = 3                  | Baseline (pre-drug)                  | 5.2                 | √ |   |   |   |   | 6 |
| Li et al., 2020[26]*  | PL, n = 22                                     | LEN, n = 22<br>Baseline (pre-drug)   | PL, 6.6<br>LEN, 5.3 | √ |   | √ | √ | √ | 7 |
| Liu et al., 2021[27]  | Cam/SOR, n = 35                                | SOR, n = 65<br>Baseline (pre-drug)   | 8.8                 | √ | √ | √ | √ | √ | 9 |
| Liu et al., 2021[28]  | TACE/LEN/Cam, n = 22                           | Baseline (pre-drug)                  | NA                  | √ | √ | √ | √ | √ | 6 |
| Mei et al., 2021[29]  | HPL (Nivo, Pembro, toripalimab, sintilimab), n | Between drugs<br>Baseline (pre-      | 15.1                | √ | √ | √ | √ | √ | 9 |

|                        |                                                  |                     |              |   |   |   |   |   |   |   |
|------------------------|--------------------------------------------------|---------------------|--------------|---|---|---|---|---|---|---|
|                        | = 45                                             | drug)               |              |   |   |   |   |   |   |   |
|                        | PL, n = 25                                       |                     |              |   |   |   |   |   |   |   |
| Rao et al., 2019[30]*  | Nivo, n = 7                                      | Baseline (pre-drug) | NA           | √ |   |   |   | √ |   | 7 |
|                        | Nivo/LRT, n = 7                                  | Baseline (pre-drug) |              |   |   |   |   |   |   |   |
| Ren et al., 2022[31]   | D-TACE-C, n = 27                                 | Between drugs       | D-           | √ | √ | √ | √ | √ |   | 9 |
|                        | C-TACE-C, n = 27                                 | Baseline (pre-drug) | TACE-C, 11.0 |   |   |   |   |   |   |   |
|                        |                                                  |                     | C-           |   |   |   |   |   |   |   |
|                        |                                                  |                     | TACE-C, 12.0 |   |   |   |   |   |   |   |
| Smith et al., 2020[32] | Nivo/RT, n = 35                                  | Baseline (pre-drug) | 12.9         | √ | √ | √ | √ |   |   | 6 |
|                        |                                                  |                     |              |   |   |   |   |   |   |   |
| Teng et al., 2021[33]  | Nivo, n = 90                                     | Baseline (pre-drug) | 8.7          | √ | √ | √ | √ |   |   | 6 |
|                        |                                                  |                     |              |   |   |   |   |   |   |   |
| Wang et al.,           | PD1 (Cam, sintilimab, toripalimab, tislelizumab, | Baseline (pre-drug) | NA           | √ | √ | √ | √ |   | √ | 9 |

|                           |                                                                  |                             |                         |      |   |   |   |   |   |   |   |
|---------------------------|------------------------------------------------------------------|-----------------------------|-------------------------|------|---|---|---|---|---|---|---|
| 2021[34]                  | Nivo,<br>durvalumab,<br>Atezo)/TKIs, n = 182                     | Pembro,                     |                         |      |   |   |   |   |   |   |   |
| Wu et al.,<br>2021[35]    | LEN/PD1<br>tislelizumab,<br>toripalimab,<br>Pembro)/TACE, n = 62 | (sintilimab,<br>Cam, drug)  | Baseline (pre-<br>drug) | 12.2 |   | √ |   | √ |   | √ | 6 |
| Xie et al.,<br>2021[36]   | Sintilimab/TKIs<br>LEN,<br>apatinib), n = 60                     | (SOR,<br>regorafenib, drug) | Baseline (pre-<br>drug) | 10.4 | √ |   | √ |   |   |   | 7 |
| You et al.,<br>2021[37]*  | Cam/TACE, n = 151                                                |                             | Baseline (pre-<br>drug) | NA   | √ | √ | √ | √ | √ | √ | 6 |
| Zhang et al.,<br>2022[38] | Cam/TACE, n = 34                                                 |                             | Baseline (pre-<br>drug) | 10.6 | √ | √ | √ | √ | √ | √ | 6 |

Abbreviations: AC, apatinib/camrelizumab; Atezo, atezolizumab; BCLC, Barcelona Clinic Liver Cancer; Bev, bevacizumab; Cam, camrelizumab; C-TACE-C, conventional transarterial chemoembolization/camrelizumab; DCR, disease control rate; D-TACE-C, drug-eluting beads transarterial



chemoembolization/camrelizumab; EMR, electronic medical records; HAIC, hepatic artery infusion chemotherapy; HBV, hepatitis B virus; HCV, hepatitis C virus; HPL, HAIC/PD1/lenvatinib; irAE, immune-related adverse event; LEN, lenvatinib; LeToHAIC, lenvatinib/toripalimab/HAIC; LRT, locoregional therapy; LT, lenvatinib/TACE; NA, not available; NAFLD, non-alcoholic fatty liver disease; Nivo, nivolumab; NOS, Nottingham Ottawa Scale; ORR, objective response rate; OS, overall survival; PD1, anti-programmed cell death 1 antibodies; Pembro, pembrolizumab; PFS, progression-free survival; PL, PD1/lenvatinib; PLT, pembrolizumab/lenvatinib/TACE; RT, radiation therapy; SBRT-IO, stereotactic body radiation therapy/nivolumab; SOR, sorafenib; TACE, transarterial chemoembolization; TKI, tyrosine kinase inhibitor; TRAE, treatment-related adverse event.

\*Conference abstract.

**Table S5. Probable prognostic factors for PFS and OS**

| Factors                                     | PFS            |                     |          | OS             |                      |          |
|---------------------------------------------|----------------|---------------------|----------|----------------|----------------------|----------|
|                                             | No. of studies | HR (95% CI)         | <i>P</i> | No. of studies | HR (95% CI)          | <i>P</i> |
| Gender (female vs. male)                    | NA             | NA                  | NA       | 1              | 1.934 (1.010-3.706)  | 0.047    |
| Age (years) ( $\geq 65$ vs. $< 65$ )        | NA             | NA                  | NA       | 1              | 2.630 (1.326–5.216)  | 0.006    |
| AFP (ng/ml) ( $\geq 400$ vs. $< 400$ )      | 3              | 2.896 (1.507-5.568) | 0.001    | NA             | NA                   | NA       |
| ECOG performance status (1/2 vs. 0)         | 1              | NA                  | 0.021    | 1              | NA                   | 0.032    |
| Child-Pugh grade (B/C vs. A)                | 1              | NA                  | 0.026    | 4              | 3.709 (1.239-11.099) | 0.019    |
| ALBI grade (1 vs. 2)                        | 1              | 0.69 (0.48-0.99)    | 0.047    | NA             | NA                   | NA       |
| BCLC stage (high vs. low)                   | NA             | NA                  | NA       | 1              | NA                   | NA       |
| Tumor number ( $> 1$ vs. 1)                 | NA             | NA                  | NA       | 1              | 3.193 (1.093-9.327)  | 0.034    |
| HBV DNA (IU/mL) ( $> 500$ vs. $\leq 500$ )  | NA             | NA                  | NA       | 1              | 1.681 (1.033-2.735)  | 0.037    |
| VB (yes vs. no)                             | NA             | NA                  | NA       | 1              | 1.875 (1.134-3.100)  | 0.014    |
| Albumin (g/L) ( $< 35$ vs. $\geq 35$ )      | NA             | NA                  | NA       | 1              | 1.833 (1.138-2.953)  | 0.013    |
| PVTT (absent vs. present)                   | NA             | NA                  | NA       | 2              | 0.49 (0.27-0.87)     | 0.01     |
| Macrovascular invasion (present vs. absent) | NA             | NA                  | NA       | 1              | 2.58 (1.01-6.58)     | 0.048    |

|                                               |    |                     |           |    |                     |           |
|-----------------------------------------------|----|---------------------|-----------|----|---------------------|-----------|
| Metastasis (absent vs. present)               | 2  | 0.63 (0.42-0.94)    | 0.02      | 2  | 0.44 (0.27-0.72)    | 0.001     |
| irAEs (yes vs. no)                            | 2  | 0.26 (0.076-0.89)   | 0.028     | 1  | 0.18 (0.05-0.58)    | 0.002     |
| Hyperprogressive disease (yes vs. no)         | 1  | 1.947 (1.226-3.093) | NA        | 1  | 1.839 (1.108-3.055) | NA        |
| NLR ( $\geq 5$ vs. $< 5$ )                    | 2  | 2.23 (1.12-4.45)    | 0.023     | 2  | 4.68 (1.87-11.73)   | $< 0.001$ |
| MELD (high vs. low)                           | NA | NA                  | NA        | 1  | NA                  | 0.004     |
| Best response by RECIST 1.1 (SD/PD vs. CR/PR) | 1  | 3.10 (1.20-7.98)    | 0.019     | NA | NA                  | NA        |
| Prior local therapy/surgery (yes vs. no)      | NA | NA                  | NA        | 1  | 0.346 (0.122–0.978) | 0.045     |
| Treatment (PL vs. HPL)                        | 1  | 2.702 (1.440-5.070) | 0.002     | 1  | 3.180 (1.608-6.290) | 0.001     |
| Treatment (PL vs. LEN)                        | 1  | 0.58 (0.17-1.93)    | NA        | NA | NA                  | NA        |
| Treatment (SBRT-IO vs. TACE)                  | 1  | 0.10 (0.03-0.33)    | $< 0.001$ | 1  | 0.14 (0.04-0.46)    | 0.001     |
| Treatment (LeToHAIC vs. LEN)                  | 1  | 0.47 (0.32-0.68)    | $< 0.001$ | 1  | 0.39 (0.24-0.64)    | $< 0.001$ |
| ICI cycles ( $\leq 5$ vs. $> 5$ )             | NA | NA                  | NA        | 1  | 2.644 (1.631-4.288) | 0.000     |

Abbreviations: AFP, alpha-fetoprotein; ALBI, albumin-bilirubin; BCLC, Barcelona Clinic Liver Cancer; CR, complete response; ECOG, Eastern Cooperative Oncology Group; HBV, hepatitis B virus; HPL, hepatic artery infusion chemotherapy/PD1/lenvatinib; ICIs, immune checkpoint inhibitors; irAE, immune-related adverse event; MELD, model for end-stage liver disease; LEN, lenvatinib; LeToHAIC, lenvatinib/toripalimab/hepatic artery infusion chemotherapy; NA, not available; NLR, neutrophil-to-lymphocyte ratio; OS, overall survival; PD, disease progression; PFS, progression-free survival; PL, PD1/lenvatinib;

PR, partial response; PVTT, portal vein tumor thrombus; SBRT-IO, SBRT-IO, stereotactic body radiation therapy/nivolumab; SD, stable disease; TACE, transarterial chemoembolization; VB, virological breakthrough.

**Table S6. Pooled analyses of frequently reported TRAEs**

| Adverse event           | Any grade (%)  |                     |              | Grade 3-4 (%)  |                     |              |
|-------------------------|----------------|---------------------|--------------|----------------|---------------------|--------------|
|                         | No. of cohorts | Rate (95% CI)       | <i>P</i> (%) | No. of cohorts | Rate (95% CI)       | <i>P</i> (%) |
| Increased AST           | 7              | 0.412 (0.262-0.563) | 91           | 9              | 0.082 (0.041-0.123) | 72           |
| Platelet count decrease | 8              | 0.375 (0.184-0.567) | 97           | 8              | 0.018 (0.003-0.034) | 4            |
| Increased ALT           | 8              | 0.362 (0.224-0.500) | 90           | 8              | 0.059 (0.021-0.097) | 68           |
| Hand and foot syndrome  | 7              | 0.361 (0.231-0.491) | 87           | 6              | 0.045 (0.021-0.068) | 0            |
| Albumin decrease        | 4              | 0.332 (0.024-0.640) | 98           | 3              | 0.008 (0.000-0.030) | 0            |
| Increased AST or ALT    | 3              | 0.322 (0.000-0.674) | 98           | NA             | NA                  | NA           |
| Anemia                  | 4              | 0.317 (0.105-0.530) | 98           | 3              | 0.012 (0.000-0.031) | 0            |
| Hypertension            | 12             | 0.288 (0.168-0.407) | 92           | 16             | 0.040 (0.016-0.064) | 63           |
| Fatigue                 | 20             | 0.277 (0.204-0.349) | 85           | 17             | 0.002 (0.000-0.009) | 0            |
| Neutrophil decrease     | 5              | 0.267 (0.100-0.433) | 96           | 5              | 0.017 (0.000-0.034) | 42           |
| Appetite loss           | 9              | 0.226 (0.101-0.352) | 93           | 9              | 0.005 (0.000-0.016) | 0            |
| Increased bilirubin     | 14             | 0.225 (0.135-0.314) | 93           | 12             | 0.013 (0.002-0.025) | 23           |
| Weight loss             | 3              | 0.210 (0.010-0.411) | 89           | 3              | 0.008 (0.000-0.029) | 0            |
| Proteinuria             | 10             | 0.198 (0.134-0.263) | 90           | 8              | 0.003 (0.000-0.012) | 31           |

|                           |    |                     |    |    |                     |    |
|---------------------------|----|---------------------|----|----|---------------------|----|
| Fever                     | 13 | 0.182 (0.093-0.271) | 88 | 13 | 0.007 (0.00-0.019)  | 0  |
| Pain                      | 6  | 0.167 (0.032-0.302) | 91 | 5  | 0.007 (0.000-0.025) | 27 |
| Hemoglobin decrease       | 3  | 0.161 (0.000-0.452) | 88 | NA | NA                  | NA |
| WBC decrease              | 6  | 0.135 (0.001-0.270) | 94 | 6  | 0.006 (0.000-0.022) | 0  |
| Diarrhea                  | 15 | 0.131 (0.082-0.179) | 75 | 15 | 0.006 (0.000-0.013) | 16 |
| Abdominal pain            | 9  | 0.130 (0.062-0.199) | 81 | 8  | 0.004 (0.000-0.017) | 0  |
| Nausea/vomiting           | 10 | 0.114 (0.051-0.178) | 83 | 10 | 0.004 (0.000-0.014) | 35 |
| Ascites                   | 4  | 0.094 (0.032-0.155) | 0  | 3  | 0.051 (0.011-0.090) | 28 |
| Rash                      | 19 | 0.094 (0.073-0.116) | 31 | 17 | 0.006 (0.000-0.015) | 1  |
| Pruritus                  | 9  | 0.091 (0.037-0.146) | 68 | 8  | 0.005 (0.000-0.015) | 0  |
| Hypothyroidism            | 12 | 0.078 (0.035-0.122) | 66 | 9  | 0.001 (0.000-0.009) | 0  |
| Gastrointestinal bleeding | 6  | 0.064 (0.038-0.090) | 49 | 6  | 0.051 (0.000-0.107) | 77 |
| Dyspnea/cough             | 7  | 0.032 (0.011-0.054) | 0  | NA | NA                  | NA |
| Edema                     | 5  | 0.023 (0.003-0.044) | 0  | NA | NA                  | NA |
| Hyperthyroidism           | 4  | 0.014 (0.000-0.037) | 44 | NA | NA                  | NA |
| Increased creatinine      | 4  | 0.013 (0.000-0.049) | 0  | NA | NA                  | NA |
| Hepatitis                 | NA | NA                  | NA | 3  | 0.026 (0.002-0.049) | 31 |

|                              |    |    |    |   |                     |   |
|------------------------------|----|----|----|---|---------------------|---|
| Gastrointestinal perforation | NA | NA | NA | 3 | 0.011 (0.000-0.028) | 0 |
| Myocarditis                  | NA | NA | NA | 3 | 0.007 (0.000-0.026) | 0 |

---

Abbreviations: ALT, alanine aminotransferase; AST, aspartate aminotransferase; NA, not available; WBC, white blood cell.

**A Median PFS**

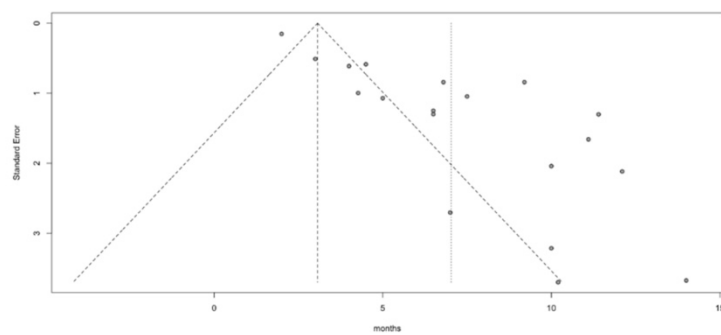

**B Median OS**

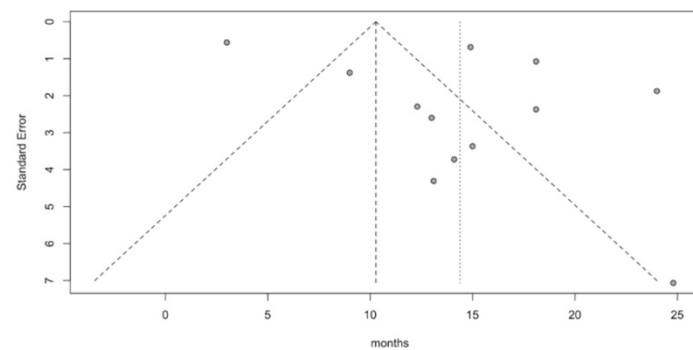

**Figure S1. Funnel plots using the data of PFS and OS for assessing publication bias.**



**A** ORR judged by mRECIST 1.1

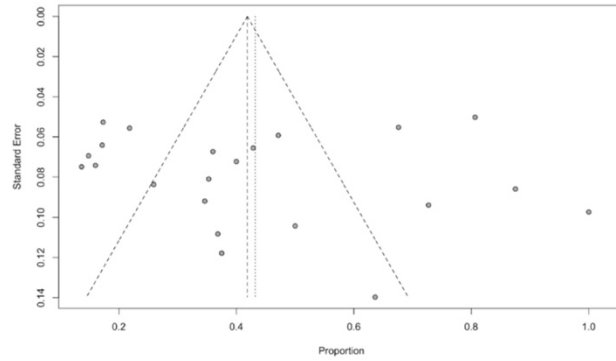

**B** DCR judged by mRECIST 1.1

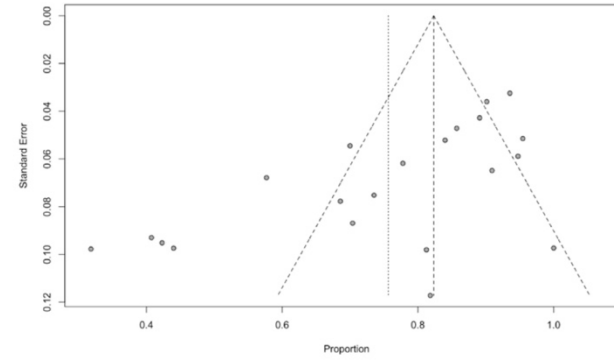

**C** ORR judged by RECIST 1.1

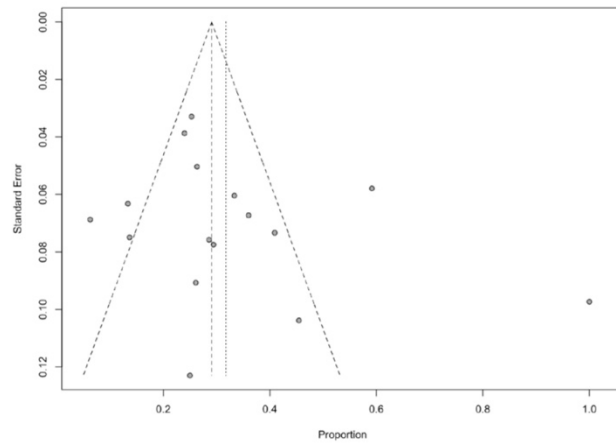

**D** DCR judged by RECIST 1.1

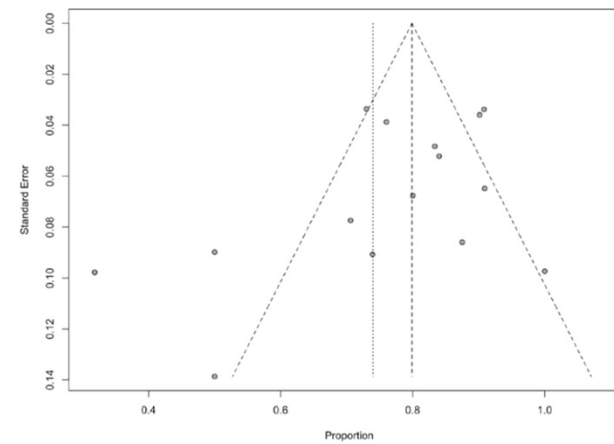

**Figure S2. Funnel plots using the data of best response for assessing publication bias.**

**Table S7. Publication bias in the pooled analyses of PFS and OS (Egger's test)**

| Outcome    | Egger's test |
|------------|--------------|
| Median PFS | < 0.0001     |
| Median OS  | 0.1378       |

Abbreviations: OS, overall survival; PFS, progression-free survival.

**Table S8. Publication bias in the pooled analyses of best response (Egger's test)**

| Outcome | mRECIST 1.1 | RECIST 1.1 |
|---------|-------------|------------|
| ORR     | 0.7091      | 0.3252     |
| DCR     | 0.0011      | 0.0525     |

Abbreviations: DCR, disease control rate; ORR, objective response rate.

**Table S9. Corrected results of trim and filling method**

| Outcome                   | Publication bias | Corrected results       |
|---------------------------|------------------|-------------------------|
| Median PFS                | Yes              | 3.3041 [0.9323; 5.6758] |
| Median OS                 | No               | /                       |
| ORR judged by mRECIST 1.1 | No               | /                       |
| DCR judged by mRECIST 1.1 | Yes              | 0.8812 [0.7799; 0.9825] |
| ORR judged by RECIST 1.1  | No               | /                       |
| DCR judged by RECIST 1.1  | No               | /                       |

Abbreviations: DCR, disease control rate; ORR, objective response rate; OS, overall survival; PFS, progression-free survival.

### A PFS

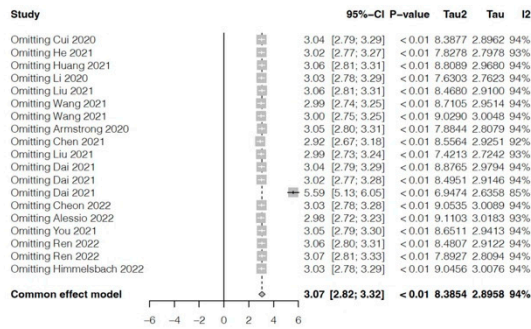

### B OS

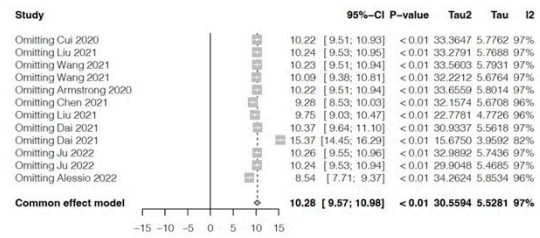

### C ORR judged by mRECIST 1.1

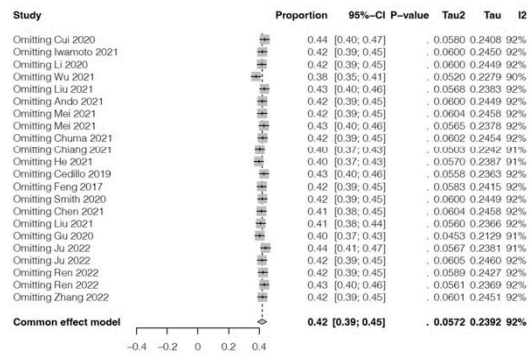

### D DCR judged by mRECIST 1.1

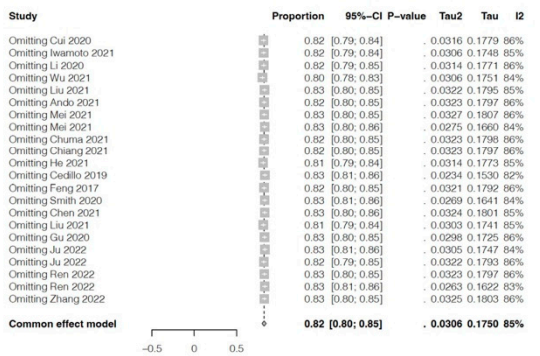

### E ORR judged by RECIST 1.1

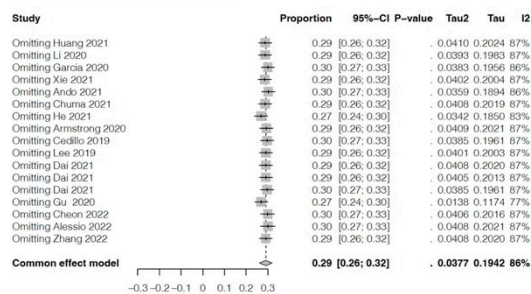

### F DCR judged by RECIST 1.1

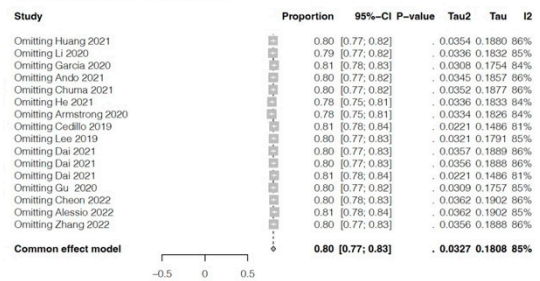

Figure S3. Sensitivity analysis.

**Table S10. Meta-regression analysis for sources of heterogeneity in the estimates**

| Outcome                      | Publication<br>year | Multicenter/single<br>center | Viral<br>etiology | Age    | Male   | Child–<br>Pugh A | BCLC<br>C     | Sample<br>size | Comparator | Follow-<br>up | Quality<br>score |
|------------------------------|---------------------|------------------------------|-------------------|--------|--------|------------------|---------------|----------------|------------|---------------|------------------|
| Median PFS                   | 0.0744              | 0.795                        | 0.7565            | 0.6276 | 0.0988 | 0.2706           | 0.7893        | 0.9908         | 0.387      | 0.7099        | 0.068            |
| Median OS                    | 0.6784              | 0.5692                       | 0.7392            | 0.8606 | 0.564  | 0.1861           | 0.1829        | 0.505          | 0.2216     | <b>0.0108</b> | 0.1046           |
| ORR judged by<br>mRECIST 1.1 | 0.3507              | 0.2513                       | 0.7837            | 0.5453 | 0.2651 | 0.1223           | 0.5963        | 0.7008         | 0.3016     | 0.8235        | 0.1605           |
| DCR judged by<br>mRECIST 1.1 | 0.9159              | 0.1061                       | 0.8862            | 0.1725 | 0.4589 | 0.7075           | 0.9926        | 0.5989         | 0.0675     | 0.0977        | 0.7091           |
| ORR judged by<br>RECIST 1.1  | 0.8854              | 0.5703                       | 0.2792            | 0.0728 | 0.1427 | 0.0874           | <b>0.0466</b> | 0.8959         | 0.8729     | 0.6568        | 0.3675           |
| DCR judged by<br>RECIST 1.1  | 0.3185              | 0.3383                       | 0.9734            | 0.7512 | 0.8297 | <b>0.009</b>     | 0.8497        | 0.4711         | 0.472      | 0.1166        | 0.8121           |

Abbreviations: BCLC, Barcelona Clinic Liver Cancer; DCR, disease control rate; ORR, objective response rate; OS, overall survival; PFS, progression-free survival.

The table showed the meta-regression *P* value for potential sources of heterogeneity.

**Table S11. Comparisons of study designs, patient characteristics, and primary outcomes between RCTs and real-world studies**

| <b>Nivolumab</b>      |                                              |                               |                               |                                |                                     |                               |                               |                             |                             |
|-----------------------|----------------------------------------------|-------------------------------|-------------------------------|--------------------------------|-------------------------------------|-------------------------------|-------------------------------|-----------------------------|-----------------------------|
|                       | <b>RCTs</b>                                  | <b>Real-world studies</b>     |                               |                                |                                     |                               |                               |                             |                             |
|                       | Yau et al.,<br>2019[39]*<br>CheckMate<br>459 | Cedillo et al.<br>2019[4]*    | Chon et al.,<br>2020[10]*     | Dharmapuri et<br>al., 2019[14] | Feng et al,<br>2017[15]             | Garcia et al.,<br>2020[16]*   | Gaudel et al.,<br>2021[17]    | Lee et al.,<br>2019[24]     | Rao et al.,<br>2019[30]*    |
| Study<br>design       | Phase 3,<br>RCT                              | Retrospective<br>cohort study | Retrospective<br>cohort study | Retrospective<br>cohort study  | Retrospective<br>cohort study       | Retrospective<br>cohort study | Retrospective<br>cohort study | Prospective<br>cohort study | Prospective<br>cohort study |
| Region                | Global,<br>multicenter                       | USA, single<br>center         | Korea,<br>multicenter         | USA, single<br>center          | Mainland<br>China, single<br>center | USA, single<br>center         | USA, single<br>center         | Taiwan,<br>single<br>center | USA, single<br>center       |
| Comparator            | Sorafenib                                    | NA                            | NA                            | NA                             | NA                                  | NA                            | NA                            | NA                          | NA                          |
| N                     | 371                                          | 22                            | 148                           | 67                             | 11                                  | 30                            | 14                            | 12                          | 7                           |
| Patient<br>population | NA                                           | NA                            | 72% HBV                       | 38% HBV,<br>54% HCV,           | NA                                  | NA                            | 71.4% HCV,<br>14.3%<br>NAFLD  | NA                          | 43% HCV,<br>36%<br>NAFLD    |

|                                   |                      |            |      |                           |                      |                      |                      |    |                        |
|-----------------------------------|----------------------|------------|------|---------------------------|----------------------|----------------------|----------------------|----|------------------------|
|                                   |                      |            |      | 9% NAFLD,<br>7% Alcoholic |                      |                      |                      |    |                        |
| Age, years<br>(mean or<br>median) | 64.2                 | 56.3       | 60   | 66                        | 54.8                 | NA                   | 63.5                 | NA | NA                     |
| Male, %                           | 85                   | 77.3       | 85   | 84                        | NA                   | 76.7                 | 100                  | NA | 71                     |
| Child-<br>Pugh, %                 | NA                   | NA         | NA   | 67 (A)/33 (B)             | NA                   | 73.3 (A)/26.7<br>(B) | 64.2 (A)/35.8<br>(B) | NA | 0 (A)/43<br>(B)/43 (C) |
| BCLC, %                           | NA                   | NA         | NA   | 20 (B)/80 (C)             | 36.4 (B)/63.6<br>(C) | 6.7 (B)/93.3<br>(C)  | NA                   | NA | NA                     |
| Median PFS<br>(95% CI),<br>months | 3.7 (3.1-<br>3.9)    | NA         | NA   | 16 (NA)                   | NA                   | 6.2 (NA)             | 4 (NA)               | NA | NA                     |
| Median OS<br>(95% CI),<br>months  | 16.4 (13.9-<br>18.4) | 11.33 (NA) | NA   | 23 (NA)                   | NA                   | 12.9 (NA)            | 8 (NA)               | NA | 5 (NA)                 |
| ORR, %                            | 15                   | 13.6       | 17.6 | NA                        | 63.6                 | 13                   | 14.3                 | 25 | NA                     |



|                            |    |      |    |    |      |      |      |    |    |
|----------------------------|----|------|----|----|------|------|------|----|----|
| DCR, %                     | NA | 31.8 | NA | NA | 81.8 | 50   | NA   | 50 | NA |
| Rate of grade 3-4 TRAEs, % | 22 | NA   | NA | NA | NA   | 13.3 | 14.3 | NA | 0  |

| Atezolizumab + Bevacizumab |                                     |                            |                            |                            |                            |                                  |                             |
|----------------------------|-------------------------------------|----------------------------|----------------------------|----------------------------|----------------------------|----------------------------------|-----------------------------|
|                            | RCTs                                | Real-world studies         |                            |                            |                            |                                  |                             |
|                            | Finn et al., 2020[40]<br>IMbrave150 | Alessio et al.,<br>2022[1] | Ando et al.,<br>2021[2]    | Cheon et al.,<br>2022[8]   | Chuma et al.,<br>2021[11]  | Himmelsbach<br>et al., 2022[20]  | Iwamoto et al.,<br>2021[22] |
| Study design               | Open-label, Phase 3, RCT            | Retrospective cohort study       | Retrospective cohort study  |
| Region                     | Global, multicenter                 | Global, multicenter        | Japan, single center       | Korea, multicenter         | Japan, multicenter         | Germany and Austria, multicenter | Japan, multicenter          |
| Comparator                 | Sorafenib                           | NA                         | NA                         | NA                         | NA                         | NA                               | NA                          |
| N                          | 336                                 | 202                        | 16                         | 121                        | 50                         | 66                               | 19                          |
| Patient population         | 49% HBV, 21% HCV                    | 18.8% HBV, 37.1% HCV,      | 68.8% HBV or HCV           | 76.9% HBV, 5.0% HCV        | 22.0% HBV, 28.0% HCV       | 13.6% HBV, 21.2% HCV,            | 10.5% HBV, 42.1% HCV        |

|                                   |                     |                                    |                      |                      |                              |                                          |                      |
|-----------------------------------|---------------------|------------------------------------|----------------------|----------------------|------------------------------|------------------------------------------|----------------------|
|                                   |                     | 11.4% NAFLD,<br>19.3%<br>Alcoholic |                      |                      |                              | 27.3%<br>NAFLD,<br>37.9%<br>Alcoholic    |                      |
| Age, years<br>(mean or<br>median) | 64                  | 69                                 | 69                   | 61                   | 72                           | 65                                       | 71                   |
| Male, %                           | 82                  | 85                                 | 68.8                 | 83.5                 | 82.0                         | 81.8                                     | 89.5                 |
| Child-<br>Pugh, %                 | 72 (A5)/28 (A6)     | 76 (A)/24 (B)                      | 100 (A)              | 100 (A)              | 92.0 (A)/8.0<br>(B)          | 53.0 (A)/34.8<br>(B)/7.6 (C)             | 89.5 (A)/10.5<br>(B) |
| BCLC, %                           | 2 (A)/15 (B)/82 (C) | 2 (A)/27 (B)/71<br>(C)             | 56.3 (B)/43.8<br>(C) | 20.7 (B)/79.3<br>(C) | 2.0 (A)/48.0<br>(B)/50.0 (C) | 1.5 (A)/33.3<br>(B)/53.0<br>(C)/12.1 (D) | 52.6 (B)/47.4<br>(C) |
| Median PFS<br>(95% CI),<br>months | 6.8 (5.7-8.3)       | 6.8 (5.2–8.5)                      | NA                   | 6.5 (4.1-9.0)        | NA                           | 6.5 (4.0-9.1)                            | 5.4 (NA)             |

|                                  |                  |                  |      |      |      |      |      |
|----------------------------------|------------------|------------------|------|------|------|------|------|
| Median OS<br>(95% CI),<br>months | 19.2 (17.0-23.7) | 14.9 (13.6–16.3) | NA   | NA   | NA   | NA   | NA   |
| ORR, %                           | 27.3             | 25               | 37.5 | 24.0 | 36.0 | 29.0 | 36.8 |
| DCR, %                           | 73.6             | 73               | 81.3 | 76.0 | 84.0 | 62.0 | 94.5 |
| Rate of<br>grade 3-4<br>TRAEs, % | 56.5             | 28               | NA   | 28.9 | NA   | 59   | 26.3 |

---

Abbreviations: BCLC, Barcelona Clinic Liver Cancer; DCR, disease control rate; HBV, hepatitis B virus; HCV, hepatitis C virus; NA, not available; NAFLD, non-alcoholic fatty liver disease; ORR, objective response rate; OS, overall survival; PFS, progression-free survival; RCT, randomized controlled trial; TRAE, treatment-related adverse event.

\*Conference abstract.

## References

1. D'Alessio, A.; Fulgenzi, C.A.M.; Nishida, N.; Schonlein, M.; von Felden, J.; Schulze, K.; Wege, H.; Gaillard, V.E.; Saeed, A.; Wietharn, B., et al. Preliminary evidence of safety and tolerability of atezolizumab plus bevacizumab in patients with hepatocellular carcinoma and Child-Pugh A and B cirrhosis: A real-world study. *Hepatology* **2022**, 10.1002/hep.32468, doi:10.1002/hep.32468.
2. Ando, Y.; Kawaoka, T.; Kosaka, M.; Shirane, Y.; Johira, Y.; Miura, R.; Murakami, S.; Yano, S.; Amioka, K.; Naruto, K., et al. Early Tumor Response and Safety of Atezolizumab Plus Bevacizumab for Patients with Unresectable Hepatocellular Carcinoma in Real-World Practice. *Cancers (Basel)* **2021**, 13, doi:10.3390/cancers13163958.
3. Armstrong, S.A.; Singh, B.P.; Kulasekaran, M.; Prins, P.; He, A.R. Predictors of immunotherapy (IO) response in hepatocellular carcinoma (HCC). *Journal of Clinical Oncology* **2020**, 38, 555-555, doi:10.1200/JCO.2020.38.4\_suppl.555.
4. Scientific Paper Abstracts Presented at the Society of Abdominal Radiology 2019 Annual Scientific Meeting and Educational Course (March 17-22, 2019, Orlando, Florida). *Abdom Radiol (NY)* **2019**, 10.1007/s00261-019-02157-2, 3210-3234, doi:10.1007/s00261-019-02157-2.
5. Chen, S.C.; Yang, M.H.; Chao, Y. Combination of Sorafenib and anti-PD-1 for advanced hepatocellular carcinoma-real world experience. *Journal for ImmunoTherapy of Cancer* **2018**, 6, doi:10.1186/s40425-018-0422-y.
6. Chen, S.; Wu, Z.; Shi, F.; Mai, Q.; Wang, L.; Wang, F.; Zhuang, W.; Chen, X.; Chen, H.; Xu, B., et al. Lenvatinib plus TACE with or without pembrolizumab for the treatment of initially unresectable hepatocellular carcinoma harbouring PD-L1 expression: a retrospective study. *J Cancer Res Clin Oncol* **2021**, 10.1007/s00432-021-03767-4, doi:10.1007/s00432-021-03767-4.
7. Cheng, J.; Li, Y.; Wu, T.; Zhang, Z.; Chen, Y.; Su, G.; Peng, C.; Zhang, L.; Lu, Y.; Zeng, Z. Upfront or add-on combination therapeutic strategy exploration in unresectable hepatocellular carcinoma using sorafenib plus sintilimab: A retrospective analysis of real-world evidence. *Journal of Clinical Oncology* **2021**, 39, doi:10.1200/JCO.2021.39.15\_suppl.e16135.
8. Cheon, J.; Yoo, C.; Hong, J.Y.; Kim, H.S.; Lee, D.W.; Lee, M.A.; Kim, J.W.; Kim, I.; Oh, S.B.; Hwang, J.E., et al. Efficacy and safety of atezolizumab plus bevacizumab in Korean patients with advanced hepatocellular carcinoma. *Liver Int* **2022**, 42, 674-681, doi:10.1111/liv.15102.
9. Chiang, C.L.; Chan, A.C.Y.; Chiu, W.H.K.; Kong, F.M. Combined Stereotactic Body Radiotherapy and Immunotherapy (SBRT-IO) vs. TACE in Locally Advanced Hepatocellular Carcinoma (HCC): Propensity Score Matching Analysis. *International Journal of Radiation Oncology, Biology, Physics* **2021**, 111, e35-e36, doi:10.1016/j.ijrobp.2021.07.352.
10. Chon, H.; Kim, C.G.; Yoon, S.; Kim, C.; Kang, B.; Choi, H.J.; Lim, H.Y. Hyperprogressive disease during PD-1 blockade in patients with advanced hepatocellular carcinoma. *Journal of Clinical Oncology* **2020**, 38, doi:10.1200/JCO.2020.38.4\_suppl.550.
11. Chuma, M.; Uojima, H.; Hattori, N.; Arase, Y.; Fukushima, T.; Hirose, S.; Kobayashi, S.; Ueno, M.; Tezuka, S.; Iwasaki, S., et al. Safety and efficacy of atezolizumab plus bevacizumab in patients with unresectable hepatocellular carcinoma in early clinical practice: a multicenter analysis. *Hepatol Res* **2021**, 10.1111/hepr.13732, doi:10.1111/hepr.13732.
12. Cui, H.Z.; Dai, G.H.; Guan, J.Z. Programmed Cell Death Protein-1 (PD-1)-Targeted Immunotherapy for Advanced Hepatocellular Carcinoma in Real World. *Oncotargets and Therapy* **2020**, 13, 143-149, doi:10.2147/ott.S234868.
13. Dai, L.; Cai, X.; Mugaanyi, J.; Liu, Y.; Mao, S.; Lu, C.; Lu, C. Therapeutic effectiveness and safety

- of sintilimab-dominated triple therapy in unresectable hepatocellular carcinoma. *Sci Rep* **2021**, *11*, 19711, doi:10.1038/s41598-021-98937-2.
14. Dharmapuri, S.; Özbek, U.; Lin, J.Y.; Schwartz, M.; Branch, A.; Ang, C. 759P - Outcomes of hepatocellular carcinoma (HCC) patients treated with nivolumab: The Mount Sinai Hospital experience. *Annals of Oncology* **2019**, *30*, v294, doi:https://doi.org/10.1093/annonc/mdz247.085.
  15. Feng, D.; Hui, X.; Shi-Chun, L.; Yan-Hua, B.; Li, C.; Xiao-Hui, L.; Jie-Yu, Y. Initial experience of anti-PD1 therapy with nivolumab in advanced hepatocellular carcinoma. *Oncotarget* **2017**, *8*, 96649-96655, doi:10.18632/oncotarget.20029.
  16. Ostios-Garcia, L.; Ramiro-Cortijo, D.; Peters, M.L.B.; Bullock, A.J. Association of immune related adverse events with superior outcomes in patients with hepatocellular carcinoma (HCC) treated with nivolumab. *Journal of Clinical Oncology* **2020**, *38*, 2.
  17. Gaudel, P.; Mohyuddin, G.R.; Fields-Meehan, J. Nivolumab Use for First-Line Management of Hepatocellular Carcinoma: Results of a Real-World Cohort of Patients. *Fed Pract* **2021**, *38*, 89-91, doi:10.12788/fp.0061.
  18. Gu, Y.-K.; Zhang, T.-Q.; Huang, Z.-L.; Geng, Z.-J.; Chen, C.; Li, F.-G.; Xu, L.; Sun, J.; Li, J.; Huang, Z.-M., et al. Hepatic artery infusion chemotherapy combined with apatinib and toripalimab in advanced hepatocellular carcinoma: Real-world data from a single center. *Journal of Clinical Oncology* **2020**, *38*, e16602-e16602, doi:10.1200/JCO.2020.38.15\_suppl.e16602.
  19. He, M.K.; Liang, R.B.; Zhao, Y.; Xu, Y.J.; Chen, H.W.; Zhou, Y.M.; Lai, Z.C.; Xu, L.; Wei, W.; Zhang, Y.J., et al. Lenvatinib, toripalimab, plus hepatic arterial infusion chemotherapy versus lenvatinib alone for advanced hepatocellular carcinoma. *Ther Adv Med Oncol* **2021**, *13*, 17588359211002720, doi:10.1177/17588359211002720.
  20. Himmelsbach, V.; Pinter, M.; Scheiner, B.; Venerito, M.; Sinner, F.; Zimpel, C.; Marquardt, J.U.; Trojan, J.; Waidmann, O.; Finkelmeier, F. Efficacy and Safety of Atezolizumab and Bevacizumab in the Real-World Treatment of Advanced Hepatocellular Carcinoma: Experience from Four Tertiary Centers. *Cancers (Basel)* **2022**, *14*, doi:10.3390/cancers14071722.
  21. Huang, C.; Zhu, X.D.; Shen, Y.H.; Wu, D.; Ji, Y.; Ge, N.L.; Chen, L.L.; Tan, C.J.; Zhou, J.; Fan, J., et al. Organ specific responses to first-line lenvatinib plus anti-PD-1 antibodies in patients with unresectable hepatocellular carcinoma: a retrospective analysis. *Biomark. Res.* **2021**, *9*, 11, doi:10.1186/s40364-021-00274-z.
  22. Iwamoto, H.; Shimose, S.; Noda, Y.; Shirono, T.; Niizeki, T.; Nakano, M.; Okamura, S.; Kamachi, N.; Suzuki, H.; Sakai, M., et al. Initial Experience of Atezolizumab Plus Bevacizumab for Unresectable Hepatocellular Carcinoma in Real-World Clinical Practice. *Cancers* **2021**, *13*, 12, doi:10.3390/cancers13112786.
  23. Ju, S.; Zhou, C.; Yang, C.; Wang, C.; Liu, J.; Wang, Y.; Huang, S.; Li, T.; Chen, Y.; Bai, Y., et al. Apatinib Plus Camrelizumab With/Without Chemoembolization for Hepatocellular Carcinoma: A Real-World Experience of a Single Center. *Front Oncol* **2021**, *11*, 835889, doi:10.3389/fonc.2021.835889.
  24. Lee, P.C.; Lee, C.; Ho, H.J.; Hou, M.C.; Huang, Y.H. Association of gut microbiome with clinical response to nivolumab in advanced hepatocellular carcinoma: A pilot study. *Journal of Hepatology* **2019**, *70*, E89-E89, doi:10.1016/s0618-8278(19)30158-6.
  25. Lee, P.C.; Chao, Y.; Chen, M.H.; Lan, K.H.; Lee, C.J.; Lee, I.C.; Chen, S.C.; Hou, M.C.; Huang, Y.H. Predictors of Response and Survival in Immune Checkpoint Inhibitor-Treated Unresectable Hepatocellular Carcinoma. *Cancers (Basel)* **2020**, *12*, doi:10.3390/cancers12010182.

26. Li, Q.; Chen, M.; Cao, M.; Yuan, G.; Hu, X.; Dai, W.; Zang, M.; Cheng, X.; Huang, J.; Hou, J., et al. Lenvatinib (LEN) plus anti-PD-1 antibodies vs LEN alone for advanced hepatocellular carcinoma (HCC): A real-world study. *Annals of Oncology* **2020**, *31*, S1310-S1310, doi:10.1016/j.annonc.2020.10.203.
27. Liu, Q.; You, N.; Li, J.; Wu, K.; Peng, X.; Wang, Z.; Wang, L.; Zhu, Y.; Zheng, L. Camrelizumab Plus Sorafenib Versus Sorafenib Monotherapy for Advanced Hepatocellular Carcinoma: A Retrospective Analysis. *Front Oncol* **2021**, *11*, 694409, doi:10.3389/fonc.2021.694409.
28. Liu, J.; Li, Z.; Zhang, W.; Lu, H.; Sun, Z.; Wang, G.; Han, X. Comprehensive Treatment of Trans-Arterial Chemoembolization Plus Lenvatinib Followed by Camrelizumab for Advanced Hepatocellular Carcinoma Patients. *Front Pharmacol* **2021**, *12*, 709060, doi:10.3389/fphar.2021.709060.
29. Mei, J.; Tang, Y.H.; Wei, W.; Shi, M.; Zheng, L.; Li, S.H.; Guo, R.P. Hepatic Arterial Infusion Chemotherapy Combined With PD-1 Inhibitors Plus Lenvatinib Versus PD-1 Inhibitors Plus Lenvatinib for Advanced Hepatocellular Carcinoma. *Frontiers in Oncology* **2021**, *11*, 8, doi:10.3389/fonc.2021.618206.
30. Rao, N.; Rizk, E.M.; Hwang, R.; Gartrell, R.D.; Makkar, J.; Oza, J.; Najjar, M.; Emond, J.; Fox, A.; Verna, E., et al. Nivolumab for hepatocellular carcinoma (HCC) in a real-world context. *Journal of Clinical Oncology* **2019**, *37*, 2, doi:10.1200/JCO.2019.37.15\_suppl.e15675.
31. Ren, Y.; Guo, Y.; Chen, L.; Sun, T.; Zhang, W.; Sun, B.; Zhu, L.; Xiong, F.; Zheng, C. Efficacy of Drug-Eluting Beads Transarterial Chemoembolization Plus Camrelizumab Compared With Conventional Transarterial Chemoembolization Plus Camrelizumab for Unresectable Hepatocellular Carcinoma. *Cancer Control* **2022**, *29*, 10732748221076806, doi:10.1177/10732748221076806.
32. Smith, W.H.; Law, A.S.; Hulkower, M.; McGee, H.M.; Lehrer, E.J.; Schwartz, M.; Taouli, B.; Sung, M.; Buckstein, M. The effect of radiation therapy on the objective response and outcomes with nivolumab for hepatocellular carcinoma. *Acta Oncol* **2020**, *59*, 940-943, doi:10.1080/0284186X.2020.1769860.
33. Teng, W.; Lin, C.C.; Ho, M.M.; Lui, K.W.; Wang, S.F.; Hsu, C.W.; Lin, S.M. Alpha-fetoprotein response at different time-points is associated with efficacy of nivolumab monotherapy for unresectable hepatocellular carcinoma. *American Journal of Cancer Research* **2021**, *11*, 2319-+.
34. Wang, K.; Xia, Y.; Zhu, Y.; Yu, W.; Guo, Y.; Liu, L. Virological breakthrough after immune checkpoint inhibitor and nucleos(t)ide analog treatment in patients with hepatitis B surface antigen positive hepatocellular carcinoma: a real-world study. *Journal for Immunotherapy of Cancer* **2021**, *9*, e003195, doi:10.1136/jitc-2021-003195.
35. Wu, J.Y.; Yin, Z.Y.; Bai, Y.N.; Chen, Y.F.; Zhou, S.Q.; Wang, S.J.; Zhou, J.Y.; Li, Y.N.; Qiu, F.N.; Li, B., et al. Lenvatinib Combined with Anti-PD-1 Antibodies Plus Transcatheter Arterial Chemoembolization for Unresectable Hepatocellular Carcinoma: A Multicenter Retrospective Study. *J Hepatocell Carcinoma* **2021**, *8*, 1233-1240, doi:10.2147/JHC.S332420.
36. Xie, D.Y.; Sun, Q.M.; Wang, X.Y.; Zhou, J.; Fan, J.; Ren, Z.G.; Gao, Q. Immune checkpoint inhibitor plus tyrosine kinase inhibitor for unresectable hepatocellular carcinoma in the real world. *Annals of Translational Medicine* **2021**, *9*, 11, doi:10.21037/atm-20-7037.
37. You, R.; Yin, G.; Xu, H.; Zhu, X.; Zhang, Q.; Wang, Q.; Cao, C.; Lu, Y.; Jiang, H.; Liu, J., et al. Camrelizumab in combination with TACE for the treatment of unresectable hepatocellular carcinoma (HCC): A multicenter, single-arm, prospective real-world study. *Journal of Clinical*

- Oncology* **2021**, 39, e16114-e16114, doi:10.1200/JCO.2021.39.15\_suppl.e16114.
38. Zhang, J.X.; Chen, P.; Liu, S.; Zu, Q.Q.; Shi, H.B.; Zhou, C.G. Safety and Efficacy of Transarterial Chemoembolization and Immune Checkpoint Inhibition with Camrelizumab for Treatment of Unresectable Hepatocellular Carcinoma. *J Hepatocell Carcinoma* **2022**, 9, 265-272, doi:10.2147/JHC.S358658.
  39. Yau, T.; Park, J.W.; Finn, R.S.; Cheng, A.L.; Mathurin, P.; Edeline, J.; Kudo, M.; Han, K.H.; Harding, J.J.; Merle, P., et al. LBA38\_PR - CheckMate 459: A randomized, multi-center phase III study of nivolumab (NIVO) vs sorafenib (SOR) as first-line (1L) treatment in patients (pts) with advanced hepatocellular carcinoma (aHCC). *Annals of Oncology* **2019**, 30, v874-v875, doi:https://doi.org/10.1093/annonc/mdz394.029.
  40. Finn, R.S.; Qin, S.; Ikeda, M.; Galle, P.R.; Ducreux, M.; Kim, T.Y.; Kudo, M.; Breder, V.; Merle, P.; Kaseb, A.O., et al. Atezolizumab plus Bevacizumab in Unresectable Hepatocellular Carcinoma. *N Engl J Med* **2020**, 382, 1894-1905, doi:10.1056/NEJMoa1915745.
